# Supplementary material for: Atomistic modeling of idealized equal channel angular pressing process
Source: Springer Nature journal article supplement (doi:10.1007/s10853-024-09414-w), 2024-02-27
Supplement: MOESM10 [file 26793286]

# Atomistic modeling of idealized equal channel angular pressing process

## Supplementary Material

Aruna Prakash<sup>1\*</sup>

<sup>1\*</sup>Micro-Mechanics & Multiscale Materials Modeling (M<sup>5</sup>),  
Institute of Mechanics and Fluid Dynamics,  
TU Bergakademie Freiberg,  
Lampadiusstr. 4, Freiberg, 09599, Germany.

Corresponding author(s). E-mail(s): [arun.prakash@imfd.tu-freiberg.de](mailto:arun.prakash@imfd.tu-freiberg.de);

## Supplementary Material

### Supplementary movies

The following movies are included as part of supplementary material.

- **Movie M1:** Deformation of Al, 50 nm sample showing the dislocation activity for strain rate  $\dot{\epsilon}_{xy} = 2 \cdot 10^8$ .
- **Movie M2:** Deformation of Ni, 50 nm sample showing the dislocation activity for strain rate  $\dot{\epsilon}_{xy} = 2 \cdot 10^8$ .
- **Movie M3:** Deformation of Cu, 50 nm sample showing the dislocation activity for strain rate  $\dot{\epsilon}_{xy} = 2 \cdot 10^8$ .
- **Movie M4:** Deformation of Al, 100 nm sample showing the dislocation activity for strain rate  $\dot{\epsilon}_{xy} = 2 \cdot 10^8$ . Only the atoms classified as hcp by the common neighbor analysis algorithm are shown.
- **Movie M5:** Deformation of Al, 100 nm sample showing the dislocation activity for strain rate  $\dot{\epsilon}_{xy} = 2 \cdot 10^9$ . Only the atoms classified as hcp by the common neighbor analysis algorithm are shown.
- **Movie M6:** Texture evolution and deformation activity from the initial configuration until approx. 15% applied shear in cluster number 1 identified by ORISODATA.
- **Movie M7:** Texture evolution and deformation activity from the initial configuration until approx. 15% applied shear in cluster number 44 identified by ORISODATA.
- **Movie M8:** Texture evolution and deformation activity from the initial configuration until approx. 15% applied shear in cluster number 62 identified by ORISODATA.
- **Movie M9:** Texture evolution and deformation activity from the initial configuration until approx. 15% applied shear in cluster number 66 identified by ORISODATA.

Note: In the movies M1 – M5 showing the deformation of the samples, the simulation box flips after 50% shear. This is a technicality in LAMMPS required to run simulations efficiently, since a large tilt requires a large volume of communication to acquire ghost atoms around a irregular-shaped subdomain of the processor. For more details, the reader is referred to the documentation of the LAMMPS package.

## Supplementary figures

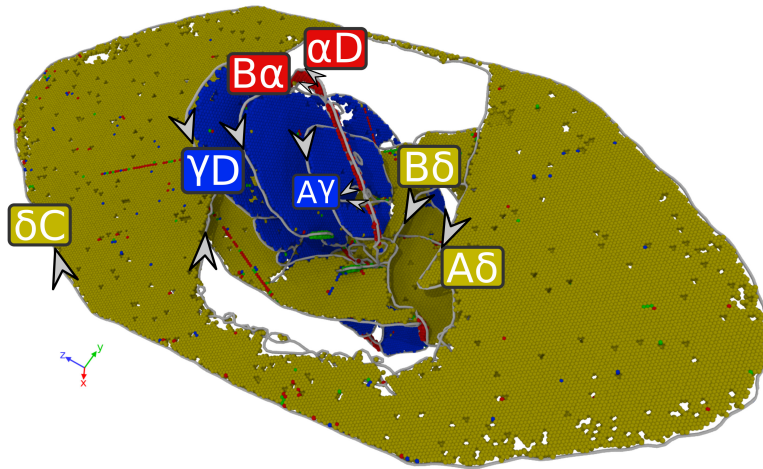

**Supplementary Figure 1:** Expansion of a partial dislocation loop creating a stacking fault in its wake. Shown here is defect configuration after approx. 12.7% shear in the Cu 50 nm sample. Only atoms classified as hcp are shown here. Atoms are colored according to the  $\{111\}$  planes they belong to. For more details on the color code, the reader is referred to fig. 3 in the main article.

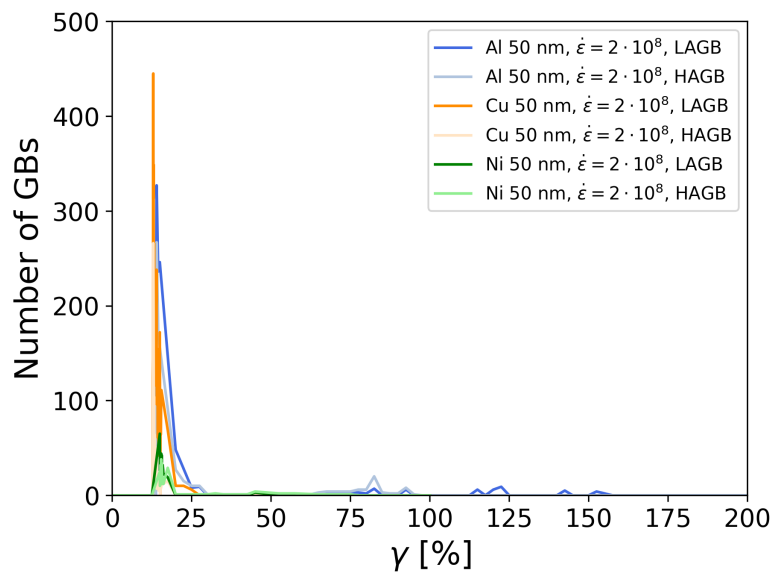

**Supplementary Figure 2:** Distribution of low angle (LAGB) and high angle (HAGB) grain boundaries in all 50 nm samples.

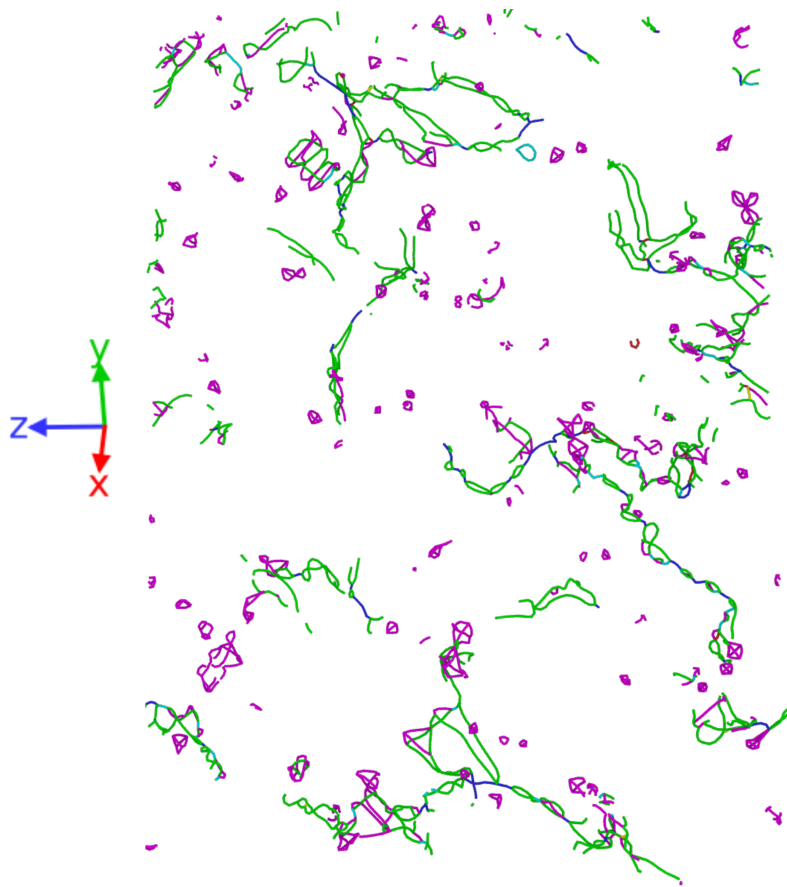

Supplementary Figure 3: Dislocation cell structure in a slice of 5 nm in the Al 50 nm sample after approx. 165% shear.
